# Supplementary material for: Unraveling the Significance of Nanog in the Generation of Embryonic Stem-like Cells from Spermatogonia Stem Cells: A Combined In Silico Analysis and In Vitro Experimental Approach
Source: MDPI journal article supplement (doi:10.3390/ijms25094833), 2024-04-29
Supplement: s1 [file s1]

## Supplementary Tables and Figures

**Supp. Table S1.** Optimized network parameters to obtain HUB network

| Column1 | Network parameter      | Range                             |
|---------|------------------------|-----------------------------------|
| 1       | Degree                 | Between 30 and 93 inclusive       |
| 2       | Betweenness Centrality | Between 0.003 and 1 inclusive     |
| 3       | Closeness Centrality   | Between 0.3 and 1 inclusive       |
| 4       | Eigenvector            | Between 0.009 and 0.219 inclusive |

**Supp. Table S2.** Top 10 enriched pathways of Gene Ontology terms based on False discovery rate. Nanog is present in enriched pathways. Their row is marked by \*

| Column1 | Category     | Term ID    | Term description                          | Observed gene count | Strength | False discovery rate |
|---------|--------------|------------|-------------------------------------------|---------------------|----------|----------------------|
| 1*      | GO Function  | GO:0005515 | Protein binding                           | 41                  | 0.37     | 5.90E-08             |
| 2*      | GO Function  | GO:0005488 | Binding                                   | 50                  | 0.21     | 6.74E-08             |
| 3       | GO Function  | GO:0005102 | Signaling receptor binding                | 19                  | 0.7      | 2.44E-06             |
| 4       | GO Function  | GO:0008083 | Growth factor activity                    | 8                   | 1.36     | 3.46E-06             |
| 5       | GO Function  | GO:0008201 | Heparin binding                           | 7                   | 1.25     | 0.00016              |
| 6*      | GO Function  | GO:0003682 | Chromatin binding                         | 11                  | 0.86     | 0.00021              |
| 7       | GO Function  | GO:0044877 | Protein-containing complex binding        | 16                  | 0.64     | 0.00023              |
| 8       | GO Function  | GO:0050839 | Cell adhesion molecule binding            | 8                   | 1.05     | 0.00037              |
| 9       | GO Function  | GO:0005104 | Fibroblast growth factor receptor binding | 4                   | 1.81     | 0.00039              |
| 10      | GO Function  | GO:0005178 | Integrin binding                          | 6                   | 1.22     | 0.00087              |
| 1       | GO Component | GO:0032991 | Protein-containing complex                | 35                  | 0.43     | 2.93E-07             |
| 2*      | GO Component | GO:0000785 | Chromatin                                 | 13                  | 0.91     | 5.51E-06             |
| 3*      | GO Component | GO:0005694 | Chromosome                                | 15                  | 0.68     | 0.00019              |
| 4       | GO Component | GO:0005615 | Extracellular space                       | 17                  | 0.61     | 0.00019              |
| 5       | GO Component | GO:0009986 | Cell surface                              | 13                  | 0.72     | 0.00026              |
| 6       | GO Component | GO:0009897 | External side of plasma membrane          | 9                   | 0.88     | 0.00089              |
| 7       | GO Component | GO:0031012 | Extracellular matrix                      | 9                   | 0.87     | 0.0009               |
| 8       | GO Component | GO:0005583 | Fibrillar collagen trimer                 | 3                   | 2.04     | 0.0011               |
| 9       | GO Component | GO:0098552 | Side of membrane                          | 10                  | 0.77     | 0.0011               |

|     |              |            |                                                                         |    |      |          |
|-----|--------------|------------|-------------------------------------------------------------------------|----|------|----------|
| 10  | GO Component | GO:0005576 | Extracellular re-<br>gion                                               | 18 | 0.48 | 0.0017   |
| 1*  | GO Process   | GO:0010033 | Response to or-<br>ganic substance                                      | 34 | 0.66 | 4.66E-13 |
| 2*  | GO Process   | GO:0070887 | Cellular re-<br>sponse to chemi-<br>cal stimulus                        | 32 | 0.69 | 5.68E-13 |
| 3*  | GO Process   | GO:0051173 | Positive regula-<br>tion of nitrogen<br>compound meta-<br>bolic process | 33 | 0.64 | 4.10E-12 |
| 4*  | GO Process   | GO:0071310 | Cellular re-<br>sponse to or-<br>ganic substance                        | 28 | 0.75 | 4.71E-12 |
| 5*  | GO Process   | GO:0070848 | Response to<br>growth factor                                            | 17 | 1.15 | 6.10E-12 |
| 6   | GO Process   | GO:0030334 | Regulation of<br>cell migration                                         | 21 | 0.96 | 6.10E-12 |
| 7*  | GO Process   | GO:0010604 | Positive regula-<br>tion of macro-<br>molecule meta-<br>bolic process   | 34 | 0.6  | 6.10E-12 |
| 8*  | GO Process   | GO:0071363 | Cellular re-<br>sponse to<br>growth factor<br>stimulus                  | 16 | 1.15 | 2.25E-11 |
| 9*  | GO Process   | GO:0009653 | Anatomical<br>structure mor-<br>phogenesis                              | 28 | 0.71 | 2.25E-11 |
| 10* | GO Process   | GO:0048522 | Positive regula-<br>tion of cellular<br>process                         | 40 | 0.47 | 2.25E-11 |

**Supp. Table S3.** Top 10 enriched TISSUES, KEGG, and Wikipathways pathways based on False discovery rate. Nanog is present in enriched pathways that their row is marked by \*. The last row of Wikipathways (11\*\*) represents an enriched pathway that wasn't among the top 10

| TISSUES, KEGG and Wikipathways |          |                 |                                           |                        |          |                         |
|--------------------------------|----------|-----------------|-------------------------------------------|------------------------|----------|-------------------------|
| Col-<br>umn1                   | Category | Term ID         | Term description                          | Observed gene<br>count | Strength | False discovery<br>rate |
| 1*                             | TISSUES  | BTO:000232<br>2 | Cell property                             | 10                     | 1.97     | 1.25E-13                |
| 2*                             | TISSUES  | BTO:000607<br>8 | Pluripotent stem cell                     | 10                     | 1.51     | 1.00E-09                |
| 3*                             | TISSUES  | BTO:000000<br>0 | Tissues, cell types and enzyme<br>sources | 45                     | 0.34     | 1.00E-09                |
| 4*                             | TISSUES  | BTO:000066<br>9 | Embryonic cell line                       | 9                      | 1.56     | 3.11E-09                |
| 5*                             | TISSUES  | BTO:000148<br>9 | Whole body                                | 44                     | 0.33     | 3.11E-09                |
| 6                              | TISSUES  | BTO:000148<br>6 | Skeletal system                           | 13                     | 1.12     | 4.75E-09                |

|      |                   |                 |                                                                |    |      |          |
|------|-------------------|-----------------|----------------------------------------------------------------|----|------|----------|
| 7    | TISSUES           | BTO:000205<br>0 | Osteogenic cell                                                | 8  | 1.63 | 5.97E-09 |
| 8*   | TISSUES           | BTO:000028<br>4 | Organism form                                                  | 22 | 0.72 | 5.97E-09 |
| 9    | TISSUES           | BTO:000159<br>3 | Osteoblast                                                     | 7  | 1.75 | 1.60E-08 |
| 10*  | TISSUES           | BTO:000109<br>9 | Blastocyst                                                     | 6  | 1.97 | 2.32E-08 |
| 1    | KEGG              | mmu05218        | Melanoma                                                       | 7  | 1.63 | 1.62E-07 |
| 2    | KEGG              | mmu05200        | Pathways in cancer                                             | 12 | 1    | 3.78E-07 |
| 3    | KEGG              | mmu04151        | PI3K-Akt signaling pathway                                     | 10 | 1.09 | 8.76E-07 |
| 4    | KEGG              | mmu04015        | Rap1 signaling pathway                                         | 8  | 1.23 | 2.46E-06 |
| 5*   | KEGG              | mmu05205        | Proteoglycans in cancer                                        | 7  | 1.19 | 2.52E-05 |
| 6    | KEGG              | mmu05226        | Gastric cancer                                                 | 6  | 1.25 | 7.21E-05 |
| 7    | KEGG              | mmu05144        | Malaria                                                        | 4  | 1.53 | 0.00038  |
| 8    | KEGG              | mmu04810        | Regulation of actin cytoskeleton                               | 6  | 1.09 | 0.00041  |
| 9    | KEGG              | mmu04014        | Ras signaling pathway                                          | 6  | 1.07 | 0.00051  |
| 10*  | KEGG              | mmu04550        | Signaling pathways regulating plu-<br>riipotency of stem cells | 5  | 1.2  | 0.00062  |
| 1*   | WikiPath-<br>ways | WP1763          | Mechanisms associated with pluripo-<br>tency                   | 11 | 1.22 | 1.15E-08 |
| 2    | WikiPath-<br>ways | WP2841          | Focal adhesion: PI3K-Akt-mTOR sig-<br>naling pathway           | 10 | 1.14 | 2.82E-07 |
| 3    | WikiPath-<br>ways | WP339           | ESC pluripotency pathways                                      | 6  | 1.36 | 2.18E-05 |
| 4    | WikiPath-<br>ways | WP5242          | Comprehensive IL-17A signaling                                 | 5  | 1.33 | 0.00021  |
| 5    | WikiPath-<br>ways | WP3632          | Lung fibrosis                                                  | 4  | 1.46 | 0.00055  |
| 6    | WikiPath-<br>ways | WP523           | Regulation of actin cytoskeleton                               | 5  | 1.16 | 0.00091  |
| 7    | WikiPath-<br>ways | WP458           | Inflammatory response pathway                                  | 3  | 1.64 | 0.0017   |
| 8    | WikiPath-<br>ways | WP85            | Focal adhesion                                                 | 5  | 1.07 | 0.0018   |
| 9    | WikiPath-<br>ways | WP2432          | Spinal cord injury                                             | 4  | 1.25 | 0.0019   |
| 10   | WikiPath-<br>ways | WP2375          | miRNAs and TFs in iPS Cell Genera-<br>tion                     | 2  | 2.1  | 0.0036   |
| 11** | WikiPath-<br>ways | WP723           | Wnt signaling pathway and pluripo-<br>tency                    | 3  | 1.13 | 0.0206   |

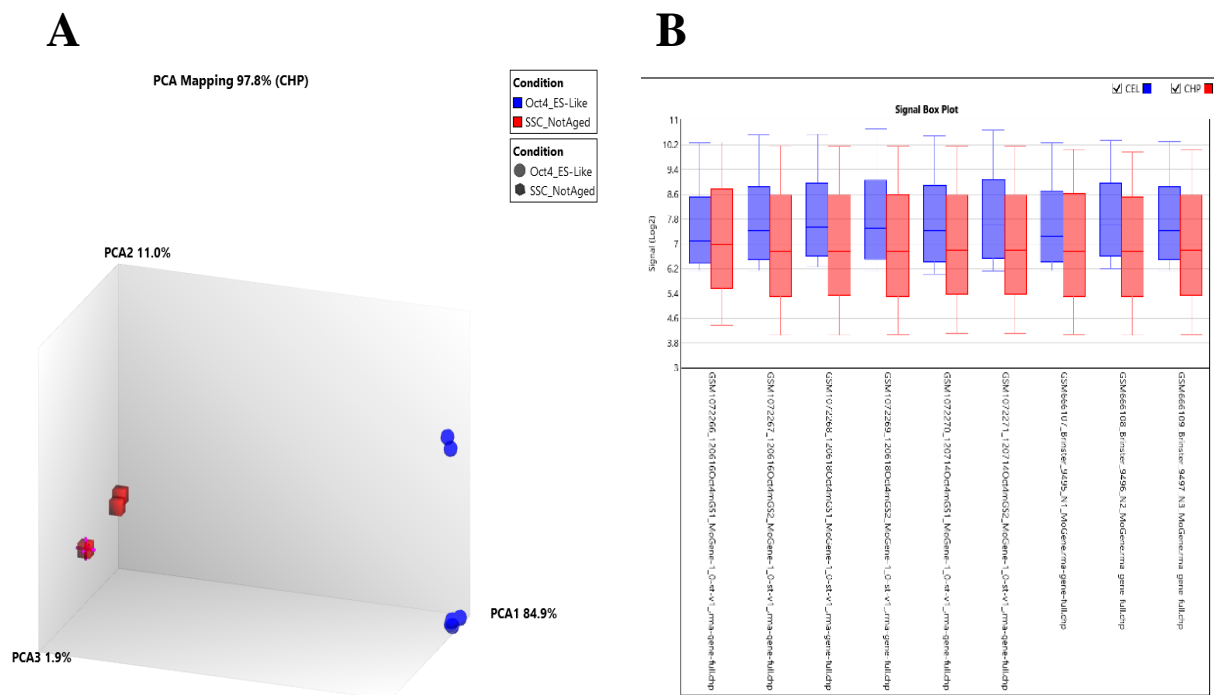

Supp. Figure S1. (A) The results of the principal component analysis (PCA), indicate that 97.8% of the variance is accounted for by the principal components. (B) Data normalization results of the microarray data.

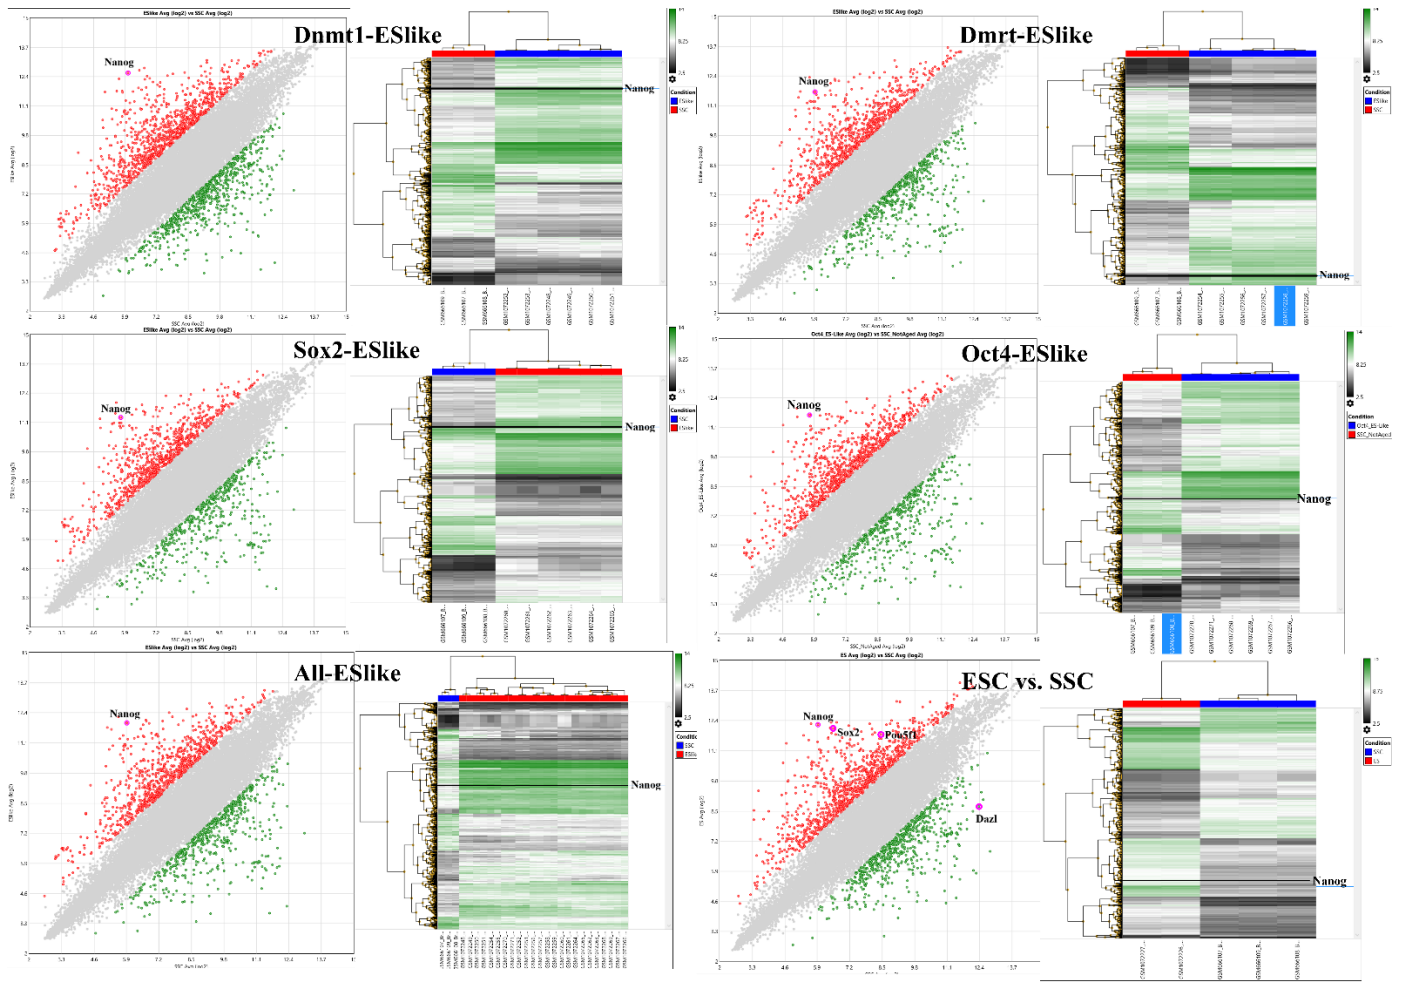

Supp. Figure S2. Confirmation analysis was conducted on samples using different combinations to test our main analysis. The results revealed consistent gene expression patterns across different combinations and samples. Specifically, Nanog and other crucial genes within the graphs exhibited similar patterns to those observed in the main figures of the analysis.

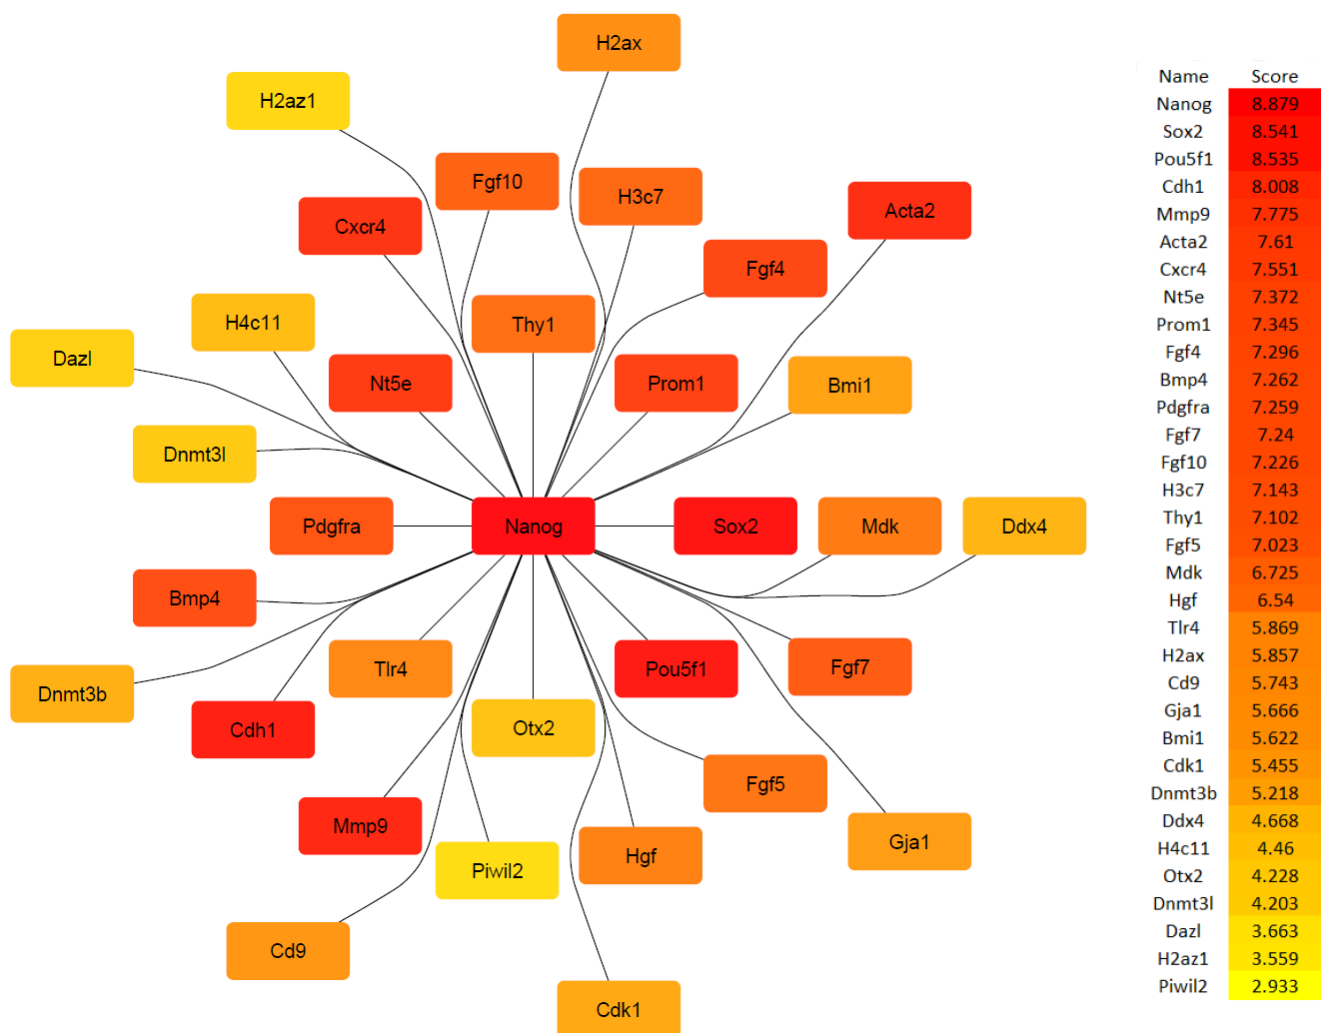

**Supp. Figure S3.** The hub gene network of Nanog and its connected nodes are visualized by the EPC method of the Cytohubba app. Darker colors represent higher scores and as a result, higher importance and fainter colors have lower scores, which represents lower importance in the network.
